# Supplementary material
Source: PubMed Central journal article supplement (PMC4139152)
Supplement: bi500704p_si_001.pdf [file bi500704p_si_001.pdf]

## **SUPPLEMENTAL FIGURE LEGENDS**

### **Figure S1. Cytochrome c released by HCCS variants**

Recombinant GST-HCCS variants with substitutions in A) Domain I, B) Domain II, C) Domain III, and D) Domain IV were co-expressed with cytochrome c in  $\Delta$ ccm *E. coli* in 1 L cultures. Cells were lysed by sonication and fractionated by ultracentrifugation. UV/vis absorption spectra were recorded for the resulting soluble fractions using 1 mg of total protein, quantified by Nanodrop. The alpha peak region of the recorded spectra is depicted and each colored spectrum represents the indicated mutant in the corresponding color.

### **Figure S2. N128A and M130A HCCS mutants exhibit distinguishable heme characteristics**

Recombinant GST-HCCS: cytochrome c co-complexes were purified from  $\Delta$ ccm *E. coli* and prepared for UV/vis absorption spectroscopy. Shown are spectra for A) N128A HCCS/ cyt c and B) M130A HCCS cyt c following purification (black line) and chemical reduction with sodium dithionite (red). Arrows indicate the wavelength (nm) of peak absorption maxima. All spectra were performed with equal amounts (100  $\mu$ g) of total purified protein. For all proteins, Bradford quantitation was confirmed by Coomassie staining, which also indicated that GST-HCCS proteins were obtained at >90% purity.

### **Figure S3. ALA treatment enhances the synthetase activity of several HCCS variants**

Recombinant GST-HCCS variants were co-expressed with cytochrome c in  $\Delta$ ccm *E. coli* either in the presence (+) or absence of ALA (-). Cells were lysed with BPER reagent and 100  $\mu$ g of

protein extracts were resolved by SDS-PAGE and transferred to nitrocellulose. Released cytochrome c was detected by heme stain. Data shown are representative of 3 replicate experiments.

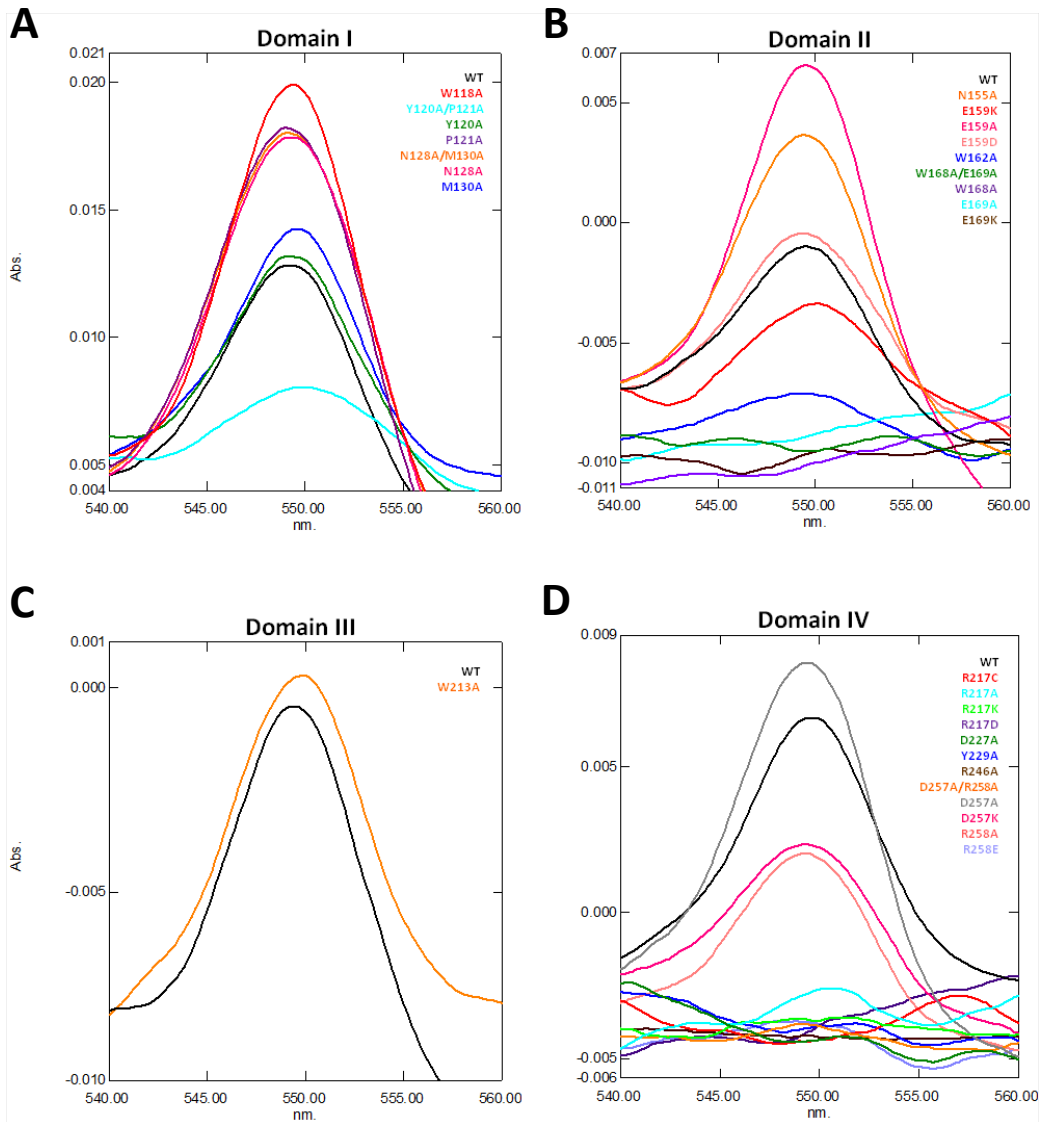

Figure S1

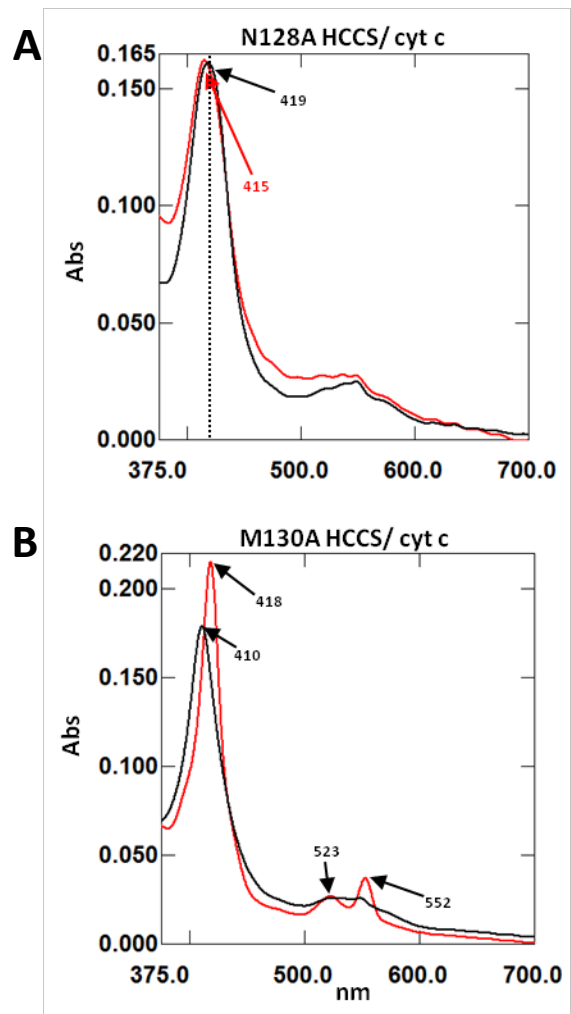

Figure S2

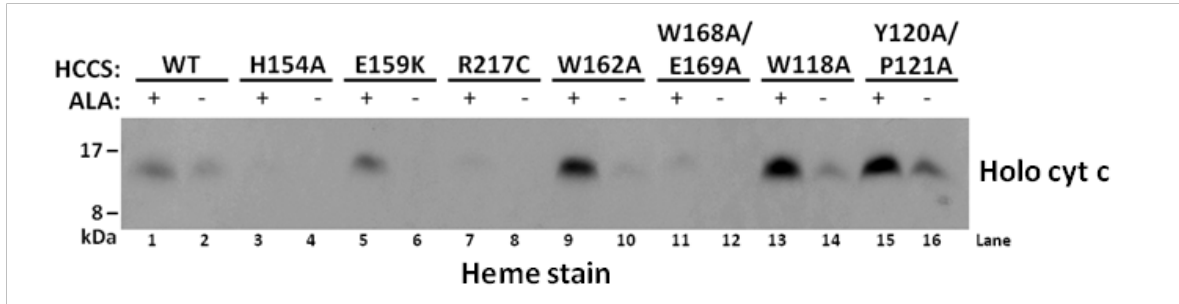

**Figure S3**

**Table S1. Oligonucleotide primers and plasmids**

|    | <b>Oligo ID</b> | <b>Sequence (5'-3')</b>                                                   | <b>Constructed plasmid</b> |
|----|-----------------|---------------------------------------------------------------------------|----------------------------|
| 1  | W118A-F         | AGC AGA TTC AGA GAA AAA GGC GGT TTA CCC TTC TGA GCA G                     | HCCS_W118A                 |
|    | W118A-R         | CTG CTC AGA AGG GTA AAC CGC CTT TTT CTC TGA ATC TGC T                     |                            |
| 2  | Y120A/P121A-F   | GAT TCA GAG AAA AAG TGG GTT GCC GCT TCT GAG CAG ATG TTC TGG A             | HCCS_Y120A/<br>P121A       |
|    | Y120A/P121A-R   | TCC AGA ACA TCT GCT CAG AAG CGG CAA CCC ACT TTT TCT CTG AAT C             |                            |
| 3  | Y120A-F         | CAG ATT CAG AGA AAA AGT GGG TTG CCC CTT CTG AGC AGA TGT TC                | HCCS_Y120A                 |
|    | Y120A-R         | GAA CAT CTG CTC AGA AGG GGC AAC CCA CTT TTT CTC TGA ATC TG                |                            |
| 4  | P121A-F         | GAG AAA AAG TGG GTT TAC GCT TCT GAG CAG ATG TTC T                         | HCCS_P121A                 |
|    | P121A-R         | AGA ACA TCT GCT CAG AAG CGT AAA CCC ACT TTT TCT C                         |                            |
| 5  | N128A/M130A-F   | CCC TTC TGA GCA GAT GTT CTG GGC TGC AGC GTT AAA GAA AGG GTG GAA GTG G     | HCCS_N128A/<br>M130A       |
|    | N128A/M130A-R   | CCA CTT CCA CCC TTT CTT TAA CGC TGC AGC CCA GAA CAT CTG CTC AGA AGG G     |                            |
| 6  | N128A-F         | CCT TCT GAG CAG ATG TTC TGG GCT GCA ATG TTA AAG AAA GGG TG                | HCCS_N128A                 |
|    | N128A-R         | CAC CCT TTC TTT AAC ATT GCA GCC CAG AAC ATC TGC TCA GAA GG                |                            |
| 7  | M130A-F         | GAG CAG ATG TTC TGG AAT GCA GCG TTA AAG AAA GGG TGG AAG TG                | HCCS_M130A                 |
|    | M130A-R         | CAC TTC CAC CCT TTC TTT AAC GCT GCA TTC CAG AAC ATC TGC TC                |                            |
| 8  | N155A-F         | GGA TAT GTA TAA TAT CAT TAG AAT TCA CGC TCA GAA TAA CGA GCA GGC TTG GAA G | HCCS_N155A                 |
|    | N155A-R         | CTT CCA AGC CTG CTC GTT ATT CTG AGC GTG AAT TCT AAT GAT ATT ATA CAT ATC C |                            |
| 9  | E159K-F         | ATT AGA ATT CAC AAT CAG AAT AAC AAG CAG GCT TGG AAG GAG                   | HCCS_E159K                 |
|    | E159K-R         | CTC CTT CCA AGC CTG CTT GTT ATT CTG ATT GTG AAT TCT AAT                   |                            |
| 10 | E159A-F         | TCA CAA TCA GAA TAA CGC GCA GGC TTG GAA GGA GA                            | HCCS_E159A                 |
|    | E159A-R         | TCT CCT TCC AAG CCT GCG CGT TAT TCT GAT TGT GA                            |                            |
| 11 | E159D-F         | AAT TCA CAA TCA GAA TAA CGA TCA GGC TTG GAA GGA GAT TTT G                 | HCCS_E159D                 |
|    | E159D-R         | CAA AAT CTC CTT CCA AGC CTG ATC GTT ATT CTG ATT GTG AAT T                 |                            |
| 12 | W162A-F         | TCA GAA TAA CGA GCA GGC TGC GAA GGA GAT TTT GAA GTG G                     | HCCS_W162A                 |
|    | W162A-R         | CCA CTT CAA AAT CTC CTT CGC AGC CTG CTC GTT ATT CTG A                     |                            |
| 13 | W168A/E169A-F   | GCT TGG AAG GAG ATT TTG AAG GCG GCA GCC CTT CAT GCT GCA                   | HCCS_W168A/<br>E169A       |
|    | W168A/E169A-R   | TGC AGC ATG AAG GGC TGC CGC CTT CAA AAT CTC CTT CCA AGC                   |                            |
| 14 | W168A-F         | TGG AAG GAG ATT TTG AAG GCG GAA GCC CTT CAT GCT GC                        | HCCS_W168A                 |
|    | W168A-R         | GCA GCA TGA AGG GCT TCC GCC TTC AAA ATC TCC TTC CA                        |                            |
| 15 | E169A-F         | GGA GAT TTT GAA GTG GGC AGC CCT TCA TGC TGC AG                            | HCCS_E169A                 |
|    | E169A-R         | CTG CAG CAT GAA GGG CTG CCC ACT TCA AAA TCT CC                            |                            |
| 16 | E169K-F         | AGG AGA TTT TGA AGT GGA AAG CCC TTC ATG CTG CA                            | HCCS_E169K                 |
|    | E169K-R         | TGC AGC ATG AAG GGC TTT CCA CTT CAA AAT CTC CT                            |                            |
| 17 | W213A-F         | GCC TTT TGA TAG GCA CGA TGC GAT CAT AAA CCG TTG CGG G                     | HCCS_W213A                 |
|    | W213A-R         | CCC GCA ACG GTT TAT GAT CGC ATC GTG CCT ATC AAA AGG C                     |                            |
| 18 | R217C-F         | AGG CAC GAT TGG ATC ATA AAC TGT TGC GGG ACA GAA                           | HCCS_R217C                 |
|    | R217C-R         | TTC TGT CCC GCA ACA GTT TAT GAT CCA ATC ATC GTG CCT                       |                            |
| 19 | R217A-F         | AGG CAC GAT TGG ATC ATA AAC GCT TGC GGG ACA GAA G                         | HCCS_R217A                 |
|    | R217A-R         | CTT CTG TCC CGC AAG CGT TTA TGA TCC AAT CGT GCC T                         |                            |
| 20 | R217K-F         | CTT TTG ATA GGC ACG ATT GGA TCA TAA ACA AGT GCG GGA CAG AAG TTA GA        | HCCS_R217K                 |
|    | R217K-R         | TCT AAC TTC TGT CCC GCA CTT GTT TAT GAT CCA ATC GTG CCT ATC AAA AG        |                            |
| 21 | R217D-F         | ATA GGC ACG ATT GGA TCA TAA ACG ATT GCG GGA CAG AAG T                     | HCCS_R217D                 |
|    | R217D-R         | ACT TCT GTC CCG CAA TCG TTT ATG ATC CAA TCG TGC CTA T                     |                            |
| 22 | D227A-F         | GAC AGA AGT TAG ATA TGT GAT TGC TTA TTA TGA TGG TGG TGA AGT CA            | HCCS_D227A                 |
|    | D227A-R         | TGA CTT CAC CAC CAT CAT AAT AAG CAA TCA CAT ATC TAA CTT CTG TC            |                            |
| 23 | Y229A-F         | CGG GAC AGA AGT TAG ATA TGT GAT TGA TTA TGC TGA TGG TGG TGA AGT C         | HCCS_Y229A                 |
|    | Y229A-R         | GAC TTC ACC ACC ATC AGC ATA ATC AAT CAC ATA TCT AAC TTC TGT CCC G         |                            |
| 24 | R246A-F         | CAC CAT CCT GGA CGT CGC TCC TGC CTT AGA TTC A                             | HCCS_R246A                 |
|    | R246A-R         | TGA ATC TAA GGC AGG AGC GAC GTC CAG GAT GGT G                             |                            |
| 25 | D257A/R258A-F   | TCA CTT TCG GCA GTA TGG GCC GCA ATG AAA GTC GCT TGG TGG                   | HCCS_D257A/<br>R258A       |
|    | D257A/R258A-R   | CCA CCA AGC GAC TTT CAT TGC GGC CCA TAC TGC CGA AAG TGA                   |                            |
| 26 | D257A-F         | ACT TTC GGC AGT ATG GGC CAG AAT GAA AGT CGC TT                            | HCCS_D257A                 |
|    | D257A-R         | AAG CGA CTT TCA TTC TGG CCC ATA CTG CCG AAA GT                            |                            |
| 27 | D257K-F         | TTC ACT TTC GGC AGT ATG GAA GAG AAT GAA AGT CGC TTG GT                    | HCCS_D257K                 |
|    | D257K-R         | ACC AAG CGA CTT TCA TTC TCT TCC ATA CTG CCG AAA GTG AA                    |                            |
| 28 | R258A-F         | CTT TCG GCA GTA TGG GAC GCA ATG AAA GTC GCT TGG TG                        | HCCS_R258A                 |
|    | R258A-R         | CAC CAA GCG ACT TTC ATT GCG TCC CAT ACT GCC GAA AG                        |                            |
| 29 | R258E-F         | CAC TTT CGG CAG TAT GGG ACG AGA TGA AAG TCG CTT GGT GGC G                 | HCCS_R258E                 |
|    | R258E-R         | CGC CAC CAA GCG ACT TTC ATC TCG TCC CAT ACT GCC GAA AGT G                 |                            |

**Table S2. Quantitation of released cytochrome c from two methods**

| <b>Putative Domain</b> | <b>HCCS variant</b> | <b>BPER<sup>a</sup></b> | <b>UV/vis<sup>b</sup></b> |
|------------------------|---------------------|-------------------------|---------------------------|
|                        | <b>WT</b>           | 1                       | 1                         |
| <b>Domain I</b>        | <b>W118A</b>        | 1.7±0.25                | 1.6±0.26                  |
|                        | <b>Y120A/P121A</b>  | 1.1±0.13                | 0.5±0.09                  |
|                        | <b>Y120A</b>        | 0.7±0.28                | 1.2±0.03                  |
|                        | <b>P121A</b>        | 0.9±0.91                | 1.9±0.22                  |
|                        | <b>N128A/M130A</b>  | 1.3±0.38                | 1.9±0.29                  |
|                        | <b>N128A</b>        | 1.5±0.15                | 1.9±0.27                  |
|                        | <b>M130A</b>        | 1.2±0.41                | 1.3±0.17                  |
| <b>Domain II</b>       | <b>N155A</b>        | 2.0±0.33                | 1.9±0.12                  |
|                        | <b>E159K</b>        | 0.1±0.01                | 0.7±0.05                  |
|                        | <b>E159A</b>        | 1.9±0.76                | 1.8±0.11                  |
|                        | <b>E159D</b>        | 1.3±0.75                | 0.9±0.08                  |
|                        | <b>W162A</b>        | 0.3±0.10                | 0.3±0.04                  |
|                        | <b>W168A/E169A</b>  | <0.1                    | nd                        |
|                        | <b>W168A</b>        | <0.1                    | nd                        |
|                        | <b>E169A</b>        | <0.1                    | nd                        |
| <b>Domain III</b>      | <b>E169K</b>        | <0.1                    | nd                        |
|                        | <b>W213A</b>        | 1.4±0.20                | 1.1±0.06                  |
| <b>Domain IV</b>       | <b>R217C</b>        | <0.1                    | nd                        |
|                        | <b>R217K</b>        | <0.1                    | nd                        |
|                        | <b>R217D</b>        | <0.1                    | nd                        |
|                        | <b>R217A</b>        | <0.1                    | nd                        |
|                        | <b>D227A</b>        | <0.1                    | nd                        |
|                        | <b>Y229A</b>        | <0.1                    | nd                        |
|                        | <b>R246A</b>        | <0.1                    | nd                        |
|                        | <b>D257A/R258A</b>  | <0.1                    | nd                        |
|                        | <b>D257A</b>        | 1.3±0.48                | 0.9±0.31                  |
|                        | <b>D257K</b>        | 0.2±0.19                | 0.4±0.16                  |
|                        | <b>R258A</b>        | <0.1                    | 0.6±0.13                  |
|                        | <b>R258E</b>        | <0.1                    | nd                        |

Each value is relative to the amount of cytochrome c released by WT HCCS, which has been set to 1. Data shown represent the average of at least two separate experiments ± SEM.

<sup>a</sup>BPERS were performed as described in Materials and Methods. Calculated values were based on the densitometric analysis of chemiluminescent signal from heme stains.

<sup>b</sup>Calculated values were based on the reduced alpha peak height in the UV/vis absorption spectrum of 1 mg total protein from the soluble fractions of 1 L cultures co-expressing each respective variant with cytochrome c.

nd = none detected

**Table S3. Quantitation of purified protein**

| Putative Domain   | HCCS variant       | Protein Levels  |                                         |
|-------------------|--------------------|-----------------|-----------------------------------------|
|                   |                    | Expressed alone | Co-expressed with cytochrome c acceptor |
|                   | <b>WT</b>          | 1               | 1                                       |
| <b>Domain I</b>   | <b>W118A</b>       | 0.55            | 0.91                                    |
|                   | <b>Y120A/P121A</b> | 0.50            | 0.53                                    |
|                   | <b>Y120A</b>       | 0.82            | 0.40                                    |
|                   | <b>P121A</b>       | 0.95            | 0.28                                    |
|                   | <b>N128A/M130A</b> | 0.95            | 0.65                                    |
|                   | <b>N128A</b>       | 0.76            | 0.61                                    |
|                   | <b>M130A</b>       | 0.75            | 0.61                                    |
| <b>Domain II</b>  | <b>N155A</b>       | 0.48            | 0.54                                    |
|                   | <b>E159K</b>       | 0.51            | 0.39                                    |
|                   | <b>E159A</b>       | 0.65            | 0.55                                    |
|                   | <b>E159D</b>       | 0.76            | 0.23                                    |
|                   | <b>W162A</b>       | 0.20            | 0.15                                    |
|                   | <b>W168A/E169A</b> | 0.14            | 0.22                                    |
|                   | <b>W168A</b>       | 0.29            | <0.10                                   |
|                   | <b>E169A</b>       | 0.30            | <0.10                                   |
|                   | <b>E169K</b>       | 0.20            | <0.10                                   |
| <b>Domain III</b> | <b>W213A</b>       | 0.45            | 0.59                                    |
| <b>Domain IV</b>  | <b>R217C</b>       | 0.14            | 0.21                                    |
|                   | <b>R217K</b>       | 0.18            | 0.12                                    |
|                   | <b>R217D</b>       | 0.23            | <0.10                                   |
|                   | <b>R217A</b>       | 0.23            | <0.10                                   |
|                   | <b>D227A</b>       | 0.52            | 0.15                                    |
|                   | <b>Y229A</b>       | 0.80            | 0.11                                    |
|                   | <b>R246A</b>       | 0.23            | <0.10                                   |
|                   | <b>D257A/R258A</b> | 0.33            | 0.13                                    |
|                   | <b>D257A</b>       | 0.59            | 0.33                                    |
|                   | <b>D257K</b>       | 0.20            | 0.15                                    |
|                   | <b>R258A</b>       | 0.33            | 0.45                                    |
|                   | <b>R258E</b>       | 0.13            | 0.11                                    |

Each value is based on the Bradford measurement of total milligrams of GST-HCCS protein purified from 1 L of culture relative to the amount of total protein purified from 1 L of WT HCCS, which has been set to 1, under each respective condition. Bradford quantitation was confirmed by Coomassie staining, which also indicated that GST-HCCS proteins were obtained at >90% purity. Data shown represent the average yield from at least two separate experiments.
